# Supplementary material
Source: PubMed Central journal article supplement (PMC4152734)
Supplement: cr2014108x2.pdf [file cr2014108x2.pdf]

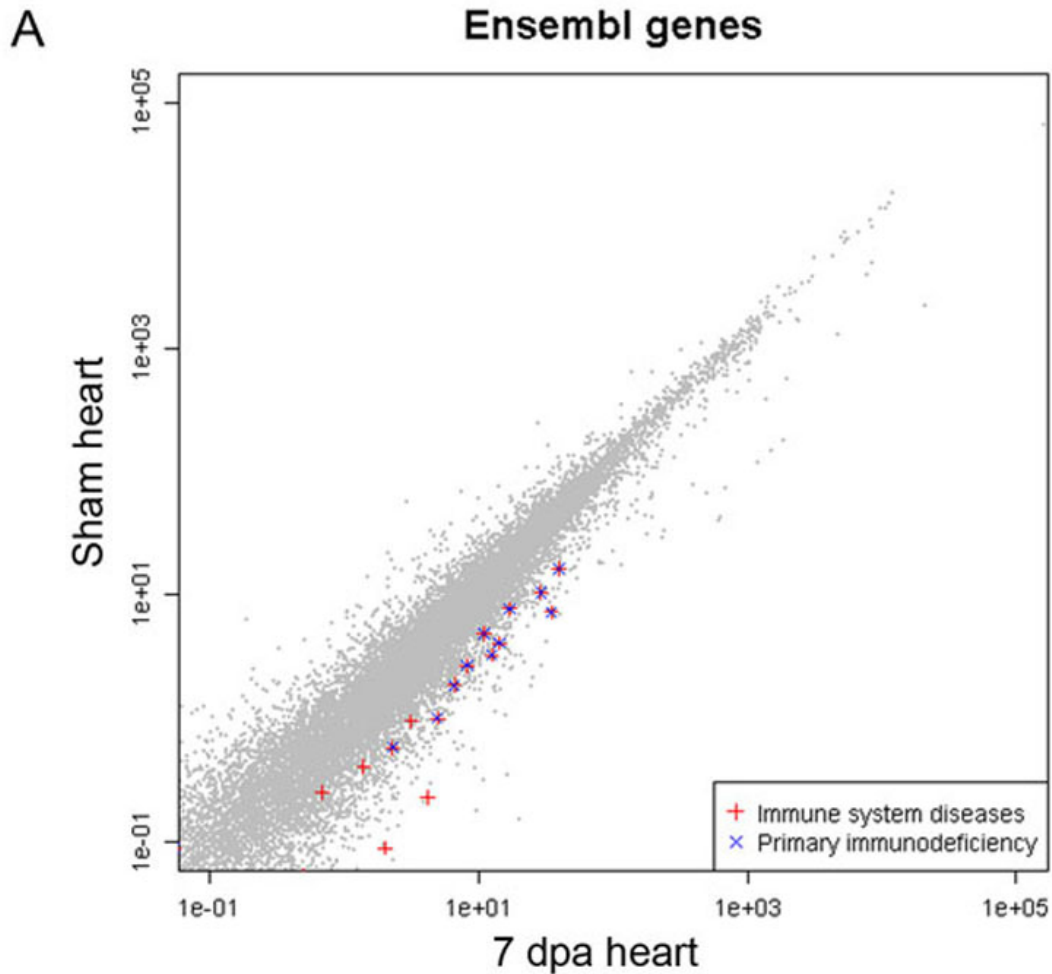

**B**

| Term                     | P.Value  | Corrected.P.Value |
|--------------------------|----------|-------------------|
| Immune system diseases   | 6.86e-05 | 0.01145437        |
| Primary immunodeficiency | 3.18e-04 | 0.03539340        |

**Supplementary information, Figure S2. Scatter plot showing expression values of Ensembl genes in sham and 7dpa hearts.** (A-B) Up-regulated genes in the pathway of “Immune system diseases” were shown in red crosses, while “Primary immunodeficiency” in blue crosses. Three up-regulated genes in the list were *p22phox*, *p47phox* and *p67phox* of the *nox2* complex.
