# Supplementary material
Source: PubMed Central journal article supplement (PMC4152734)
Supplement: cr2014108x3.pdf [file cr2014108x3.pdf]

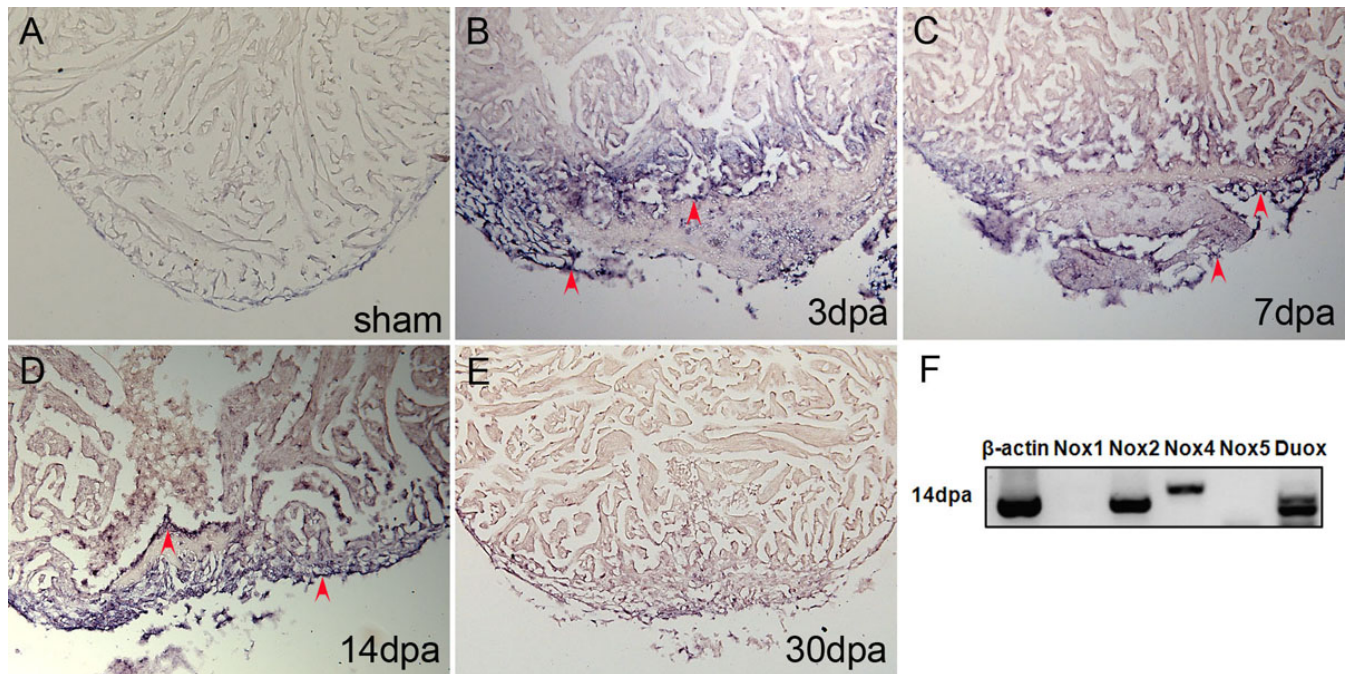

**Supplementary information, Figure S3. *Duox* expression during heart regeneration.**

(A-E) RNA *in situ* hybridization was performed on paraffin sections from adult hearts *duox* probe 1. *Duox* expression was low or undetectable in sham hearts (A), and increased in injured areas at 3 dpa (B), reached a plateau at 7 and 14 dpa (C-D), and resumed a low basal level at 30 dpa after almost complete myocardial regeneration (E). (F) RT-PCR revealed that *duox* and *nox2*, while much less *nox4*, were expressed in 14 dpa hearts after performing 40 PCR cycles. Scale bar: 100  $\mu$ m.
