# Supplementary material
Source: PubMed Central journal article supplement (PMC4152734)
Supplement: cr2014108x5.pdf [file cr2014108x5.pdf]

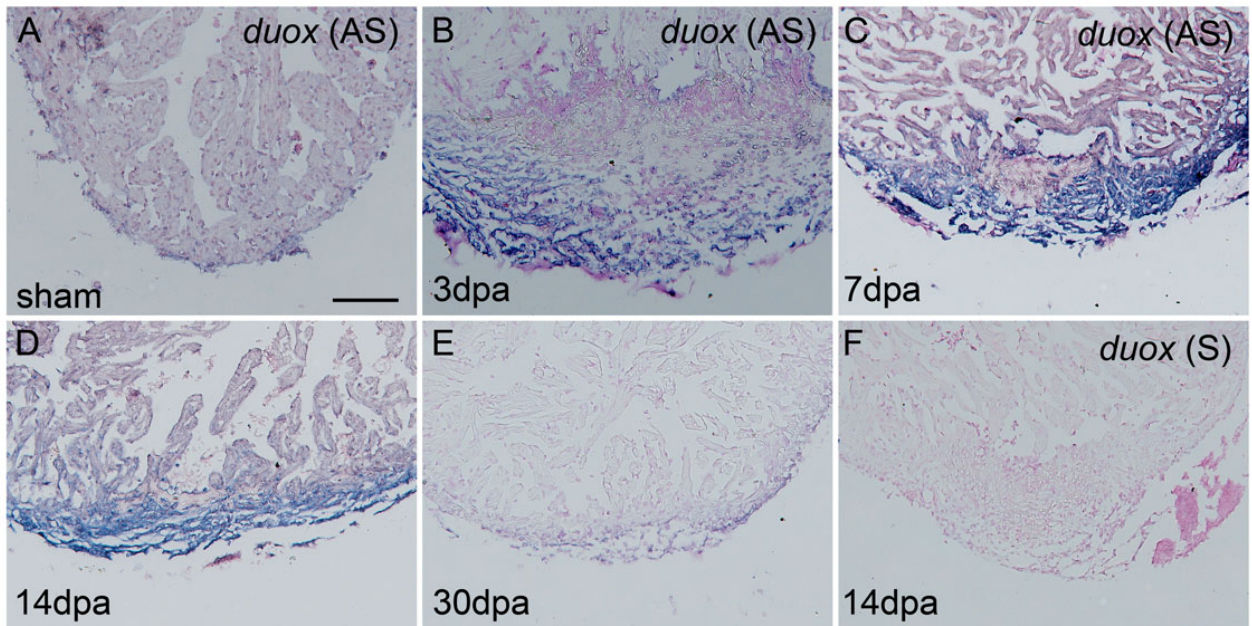

**Supplementary information, Figure S5. *Duox* expression in the wound area during heart regeneration.** RNA *in situ* hybridization was performed on paraffin sections from adult hearts with antisense (AS) *duox* probe 2 (A-E), and with sense (S) *duox* probe 2 (F). *Duox* expression was low or undetectable in sham hearts (A), and increased in injured areas at 3 dpa (B), reached a plateau at 7 and 14dpa (C-D), and resumed a low basal level at 30 dpa after almost complete myocardial regeneration (E). (F) Note no detectable signals at 14 dpa by sense *duox* probe 2 that was made from *duox* clone 2. The sections were co-stained with nuclear fast red (Sigma; N3020). Scale bar: 100  $\mu$ m.
