# Supplementary material
Source: PubMed Central journal article supplement (PMC4152734)
Supplement: cr2014108x6.pdf [file cr2014108x6.pdf]

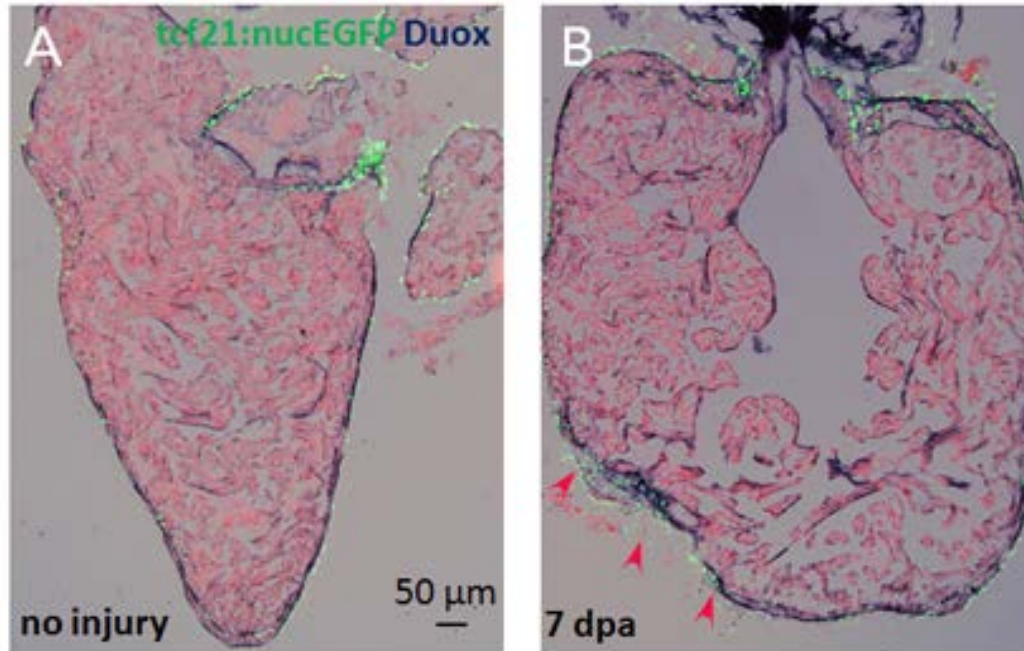

**Supplementary information, Figure S6. Partial overlapping of *duox* with epicardial Tg(*tcf21*:nucEGFP) during heart regeneration.** After images of Tg(*tcf21*:nucEGFP), we performed RNA *in situ* hybridization with *duox* probe 1 on 10 μm cryosections of Tg(*tcf21*:nucEGFP) hearts at sham and 7 dpa. Note the induced expression of *duox* and partial colocalization with epicardial reporter Tg(*tcf21*:nucEGFP) in injured areas (red arrowheads) and the areas distal to the injury site at 7 dpa (B) while little staining at sham (A). Scale bar: 50 μm.
