# Supplementary material
Source: PubMed Central journal article supplement (PMC4152734)
Supplement: cr2014108x7.pdf [file cr2014108x7.pdf]

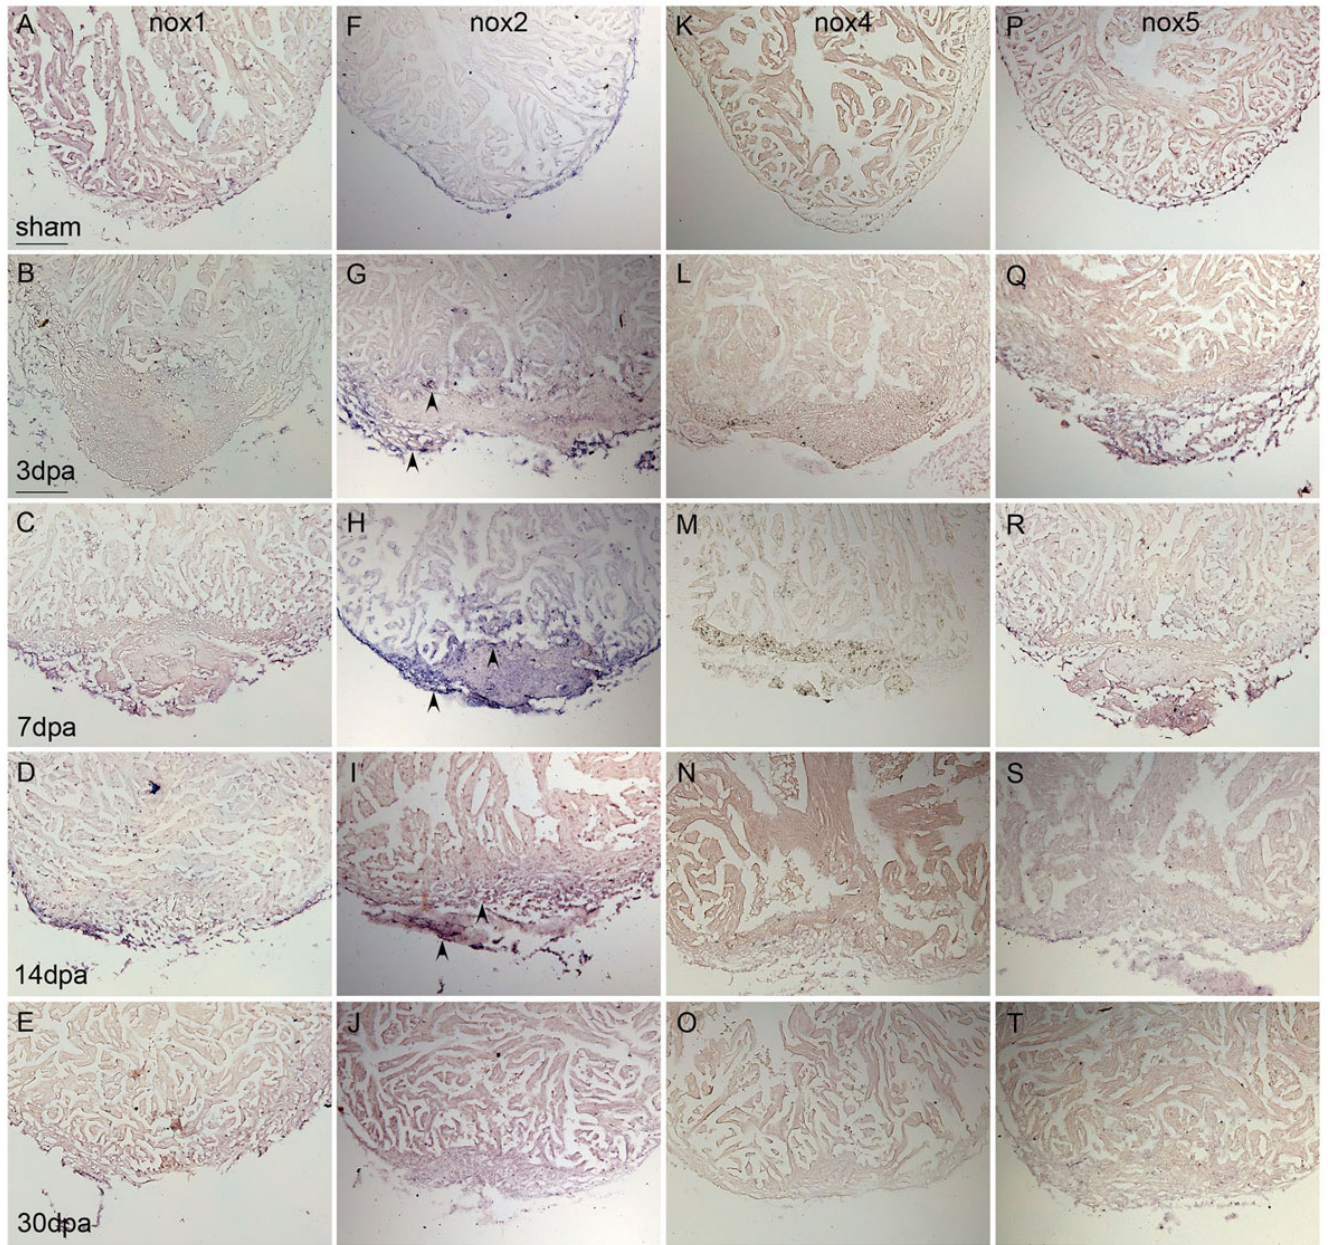

**Supplementary information, Figure S7. *Nox2*, but not *nox1*, *nox4* and *nox5*, was expressed during heart regeneration.** RNA *in situ* hybridization was carried out on paraffin sections of hearts with *nox1*, *nox2*, *nox4* and *nox5* probes. Note clear *nox2* expression in the injured area at 3, 7 and 14 dpa, and low-level expression at sham and 30 dpa in the second column (F-J). (L-M) Some alkaline phosphatase substrates were

non-specifically deposited on the tissue sections due to extra-overnight staining. Scale bar:  
100  $\mu\text{m}$ .
