# Supplementary material
Source: PubMed Central journal article supplement (PMC4152734)
Supplement: cr2014108x10.pdf [file cr2014108x10.pdf]

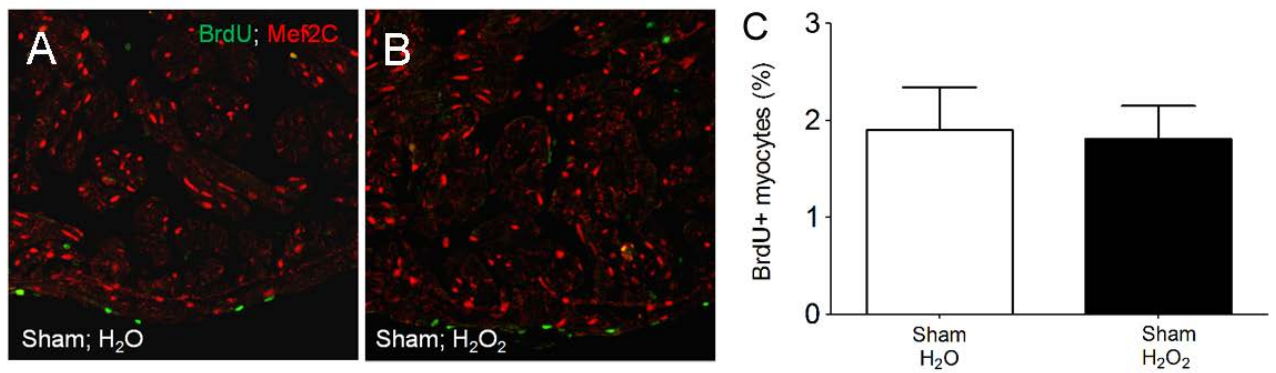

**Supplementary information, Figure S10.** Exogenous H<sub>2</sub>O<sub>2</sub> do not stimulate myocyte proliferation in adult hearts. H<sub>2</sub>O or 30  $\mu$ M H<sub>2</sub>O<sub>2</sub> was co-injected with BrdU into the thoracic cavity of sham-operated zebrafish hearts once daily for 7 days. (A-B) Double staining of control H<sub>2</sub>O-injected (A) and H<sub>2</sub>O<sub>2</sub>-injected (B) hearts with anti-BrdU and Mef2C antibody. (C) Statistics of the BrdU<sup>+</sup>/Mef2C<sup>+</sup> myocytes. Note that most of the green BrdU<sup>+</sup> stainings are not cardiomyocytes. N=3.
