# Supplementary material
Source: PubMed Central journal article supplement (PMC4152734)
Supplement: cr2014108x11.pdf [file cr2014108x11.pdf]

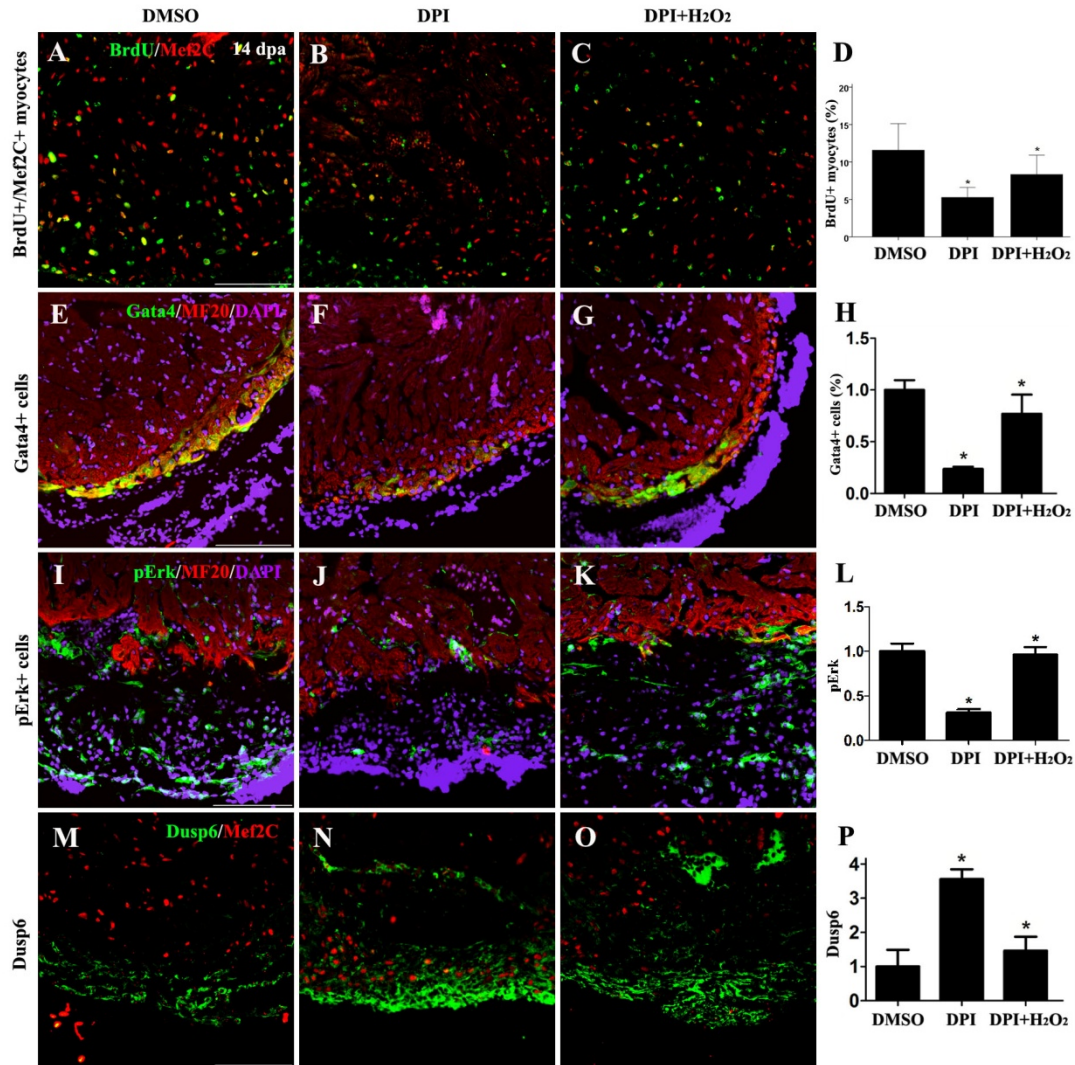

**Supplementary information, Figure S11. H<sub>2</sub>O<sub>2</sub> rescues heart regeneration in the presence of DPI.** DPI (10  $\mu$ M) inhibited BrdU<sup>+</sup>/Mef2C<sup>+</sup> myocytes (B), Gata4<sup>+</sup> cells (F) and pErk (J) but induced Dusp6 (N), compared with DMSO controls (A, E, I, M) at 14 dpa, of which effect was rescued by applying 100  $\mu$ M H<sub>2</sub>O<sub>2</sub> from 7 to 14 dpa (C, G, K, O). Statistics of these immunostaining data was shown (D, H, L, P). \* represents statistic significance. Scale bars: 100  $\mu$ m.
