# Supplementary material
Source: PubMed Central journal article supplement (PMC4152734)
Supplement: cr2014108x12.pdf [file cr2014108x12.pdf]

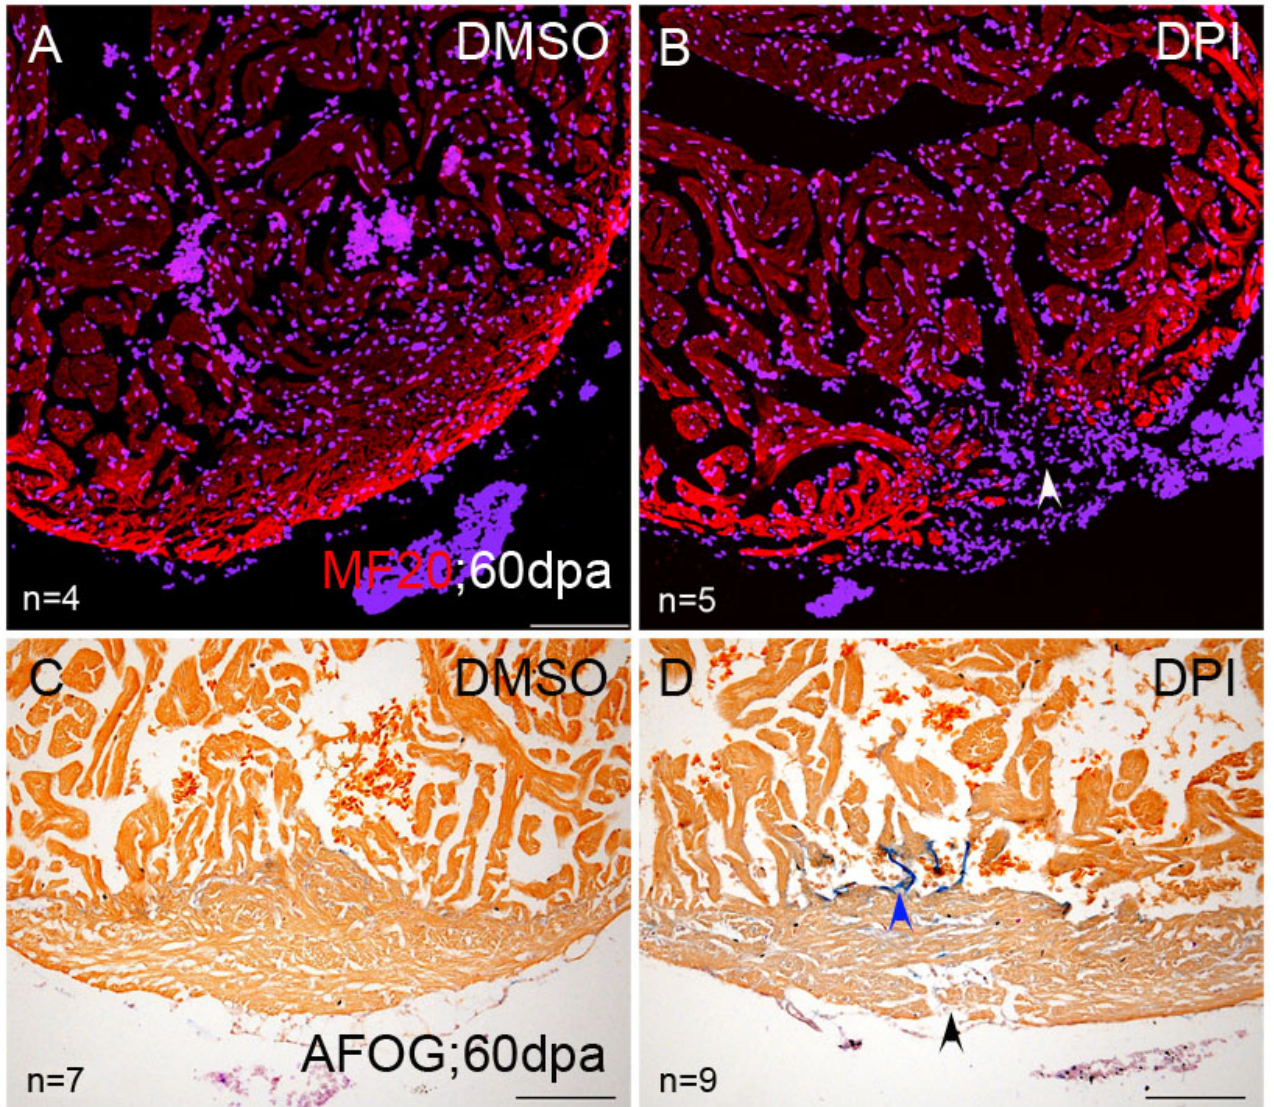

**Supplementary information, Figure S12. DPI irreversibly inhibited heart**

**regeneration.** DPI inhibited cardiac regeneration by MF20 staining (B; arrowhead) and increased cardiac fibrosis by AFOG staining (D; blue arrowhead), compared with their siblings (A, C). Black arrowhead (D) showing compromised heart regeneration. Scale bars:100  $\mu\text{m}$ .
