# Supplementary material
Source: PubMed Central journal article supplement (PMC4152734)
Supplement: cr2014108x14.pdf [file cr2014108x14.pdf]

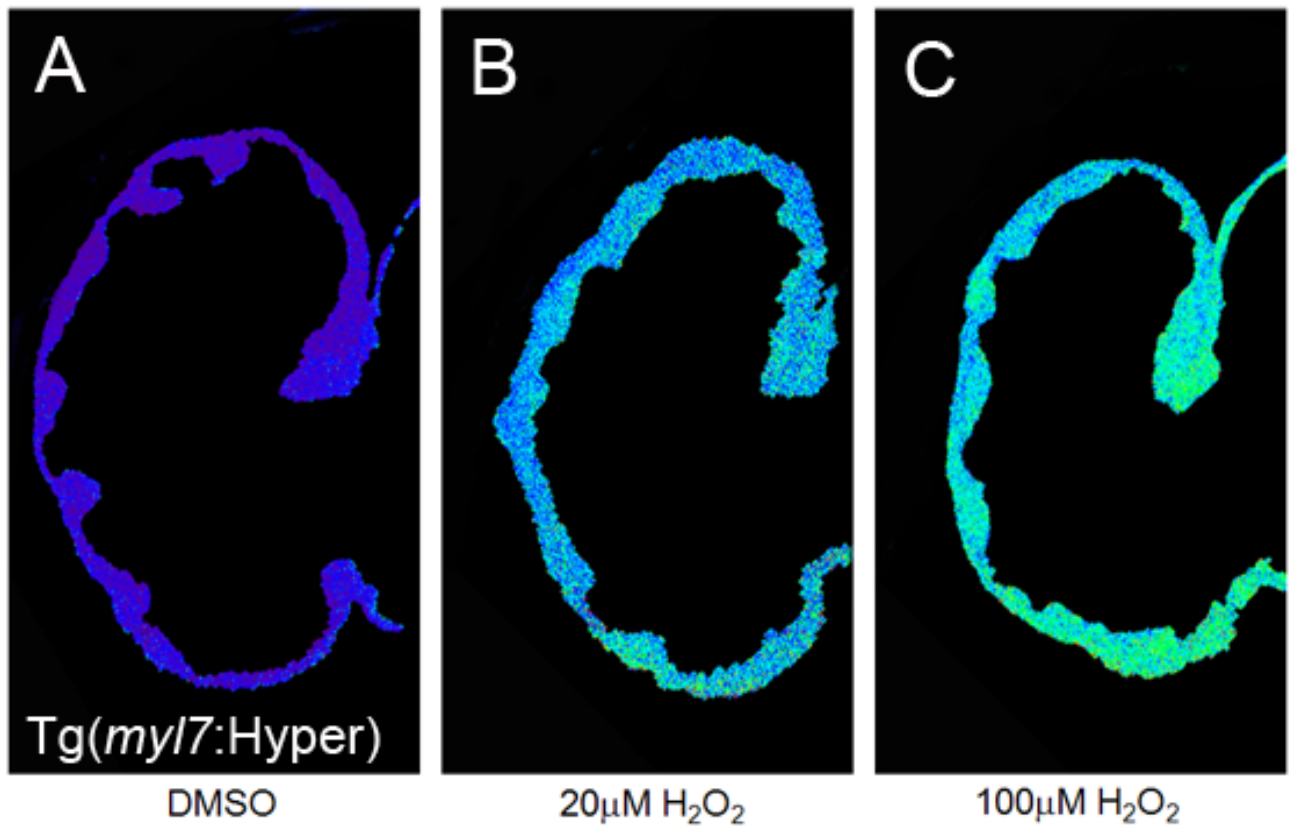

**Supplementary information, Figure S14. H<sub>2</sub>O<sub>2</sub> penetrate freely into zebrafish cardiac tissue.** Tg(*myI7:Hyper*) transgenic zebrafish embryos at 3 dpf were bathed in DMSO or H<sub>2</sub>O<sub>2</sub> for 3 hours. They were then treated with 20 mM BDM (2,3-Butanedione monoxime, Sigma) for stopping heart beating. Images were taken under 20X water objective lens with a Zeiss LSM700 upright confocal microscope.
