# Supplementary material
Source: PubMed Central journal article supplement (PMC4152734)
Supplement: cr2014108x15.pdf [file cr2014108x15.pdf]

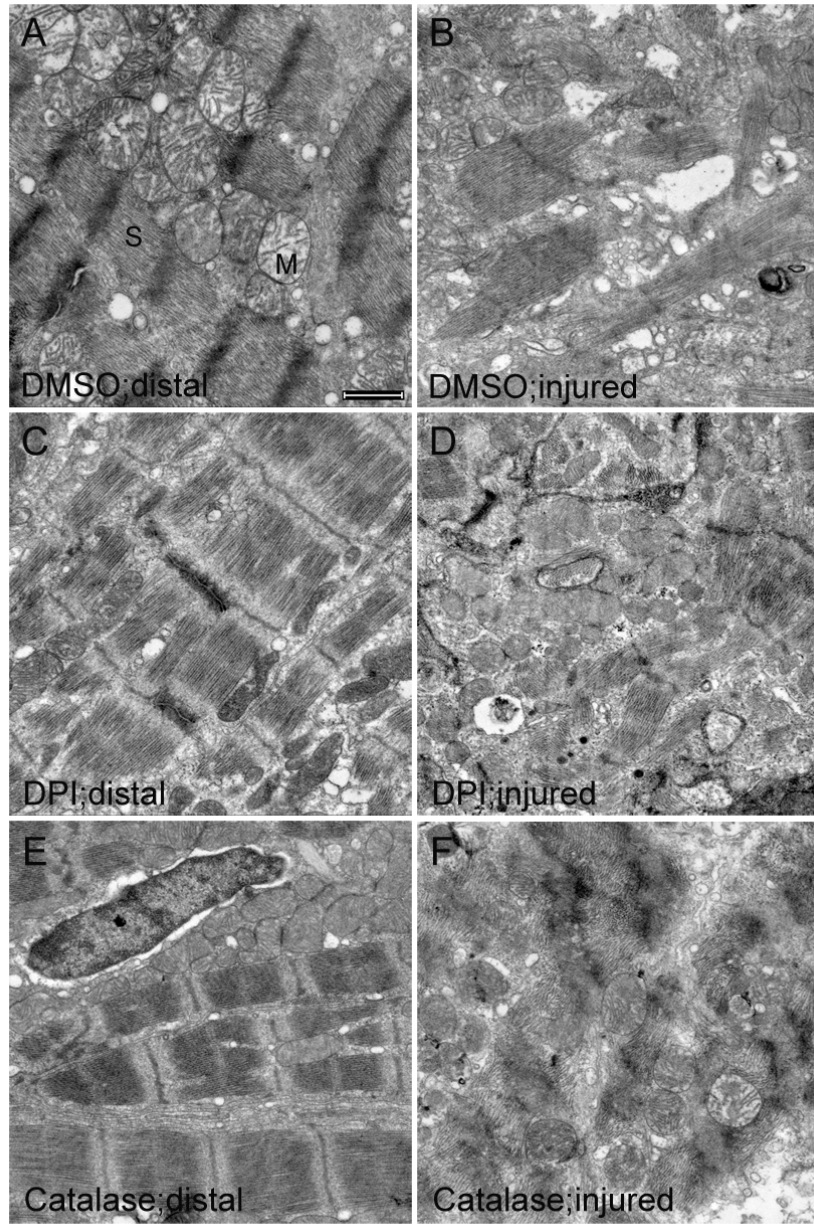

**Supplementary information, Figure S15. Inhibiting  $H_2O_2$  signaling has no effect on cardiac sarcomere disassembly during heart regeneration.** Transmission electron microscopic images of myocytes of DMSO-treated heart (A-B), DPI-treated heart (C-D) and Tg(*myl7*:catalase-DsRed) transgenic heart (E-F) at 14 dpa. Note the normal sarcomere structure in distal myocytes from the injury site (A, C, E) and abnormal sarcomere disassembly in myocytes in the injury site (B, D, F). Scale bar: 1  $\mu$ m.
