# Supplementary material
Source: PubMed Central journal article supplement (PMC4152734)
Supplement: cr2014108x17.pdf [file cr2014108x17.pdf]

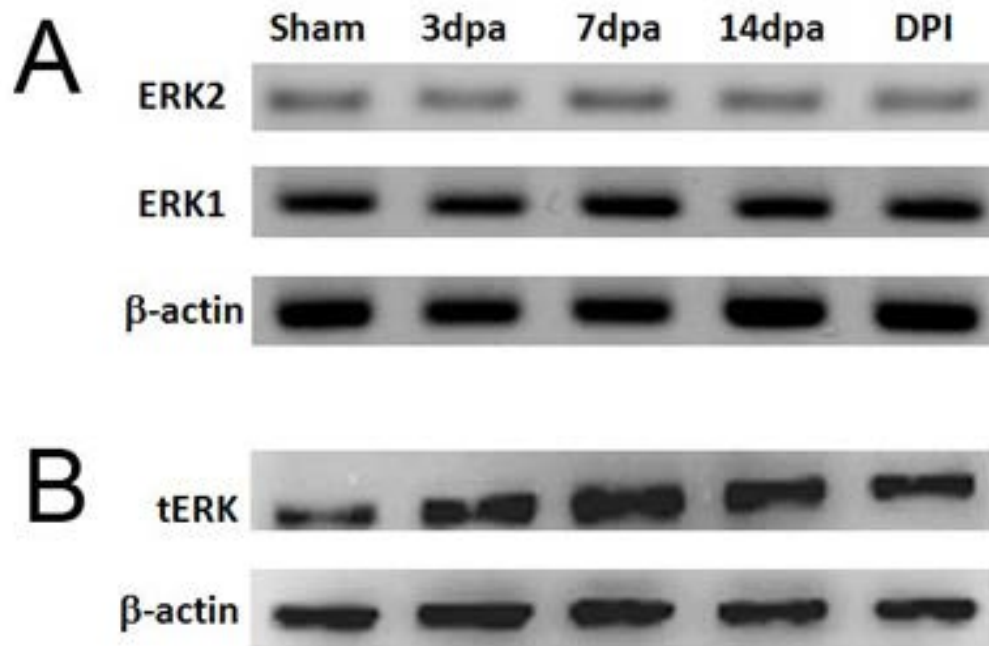

**Supplementary information, Figure S17. Total Erk mRNA are slightly induced during heart regeneration.** (A) Semi-quantitative RT-PCR of ERK1 and ERK2 at sham, 3, 7, and 14 dpa hearts, as well as 14 dpa hearts with DPI treatments by using 25 PCR cycles.  $\beta$ -actin was used as an internal control. (B) Total ERK (tERK) proteins were determined by Western blot with anti-tERK (Pierce).  $\beta$ -actin was used as an internal control.
