# Supplementary material
Source: PubMed Central journal article supplement (PMC4152734)
Supplement: cr2014108x18.pdf [file cr2014108x18.pdf]

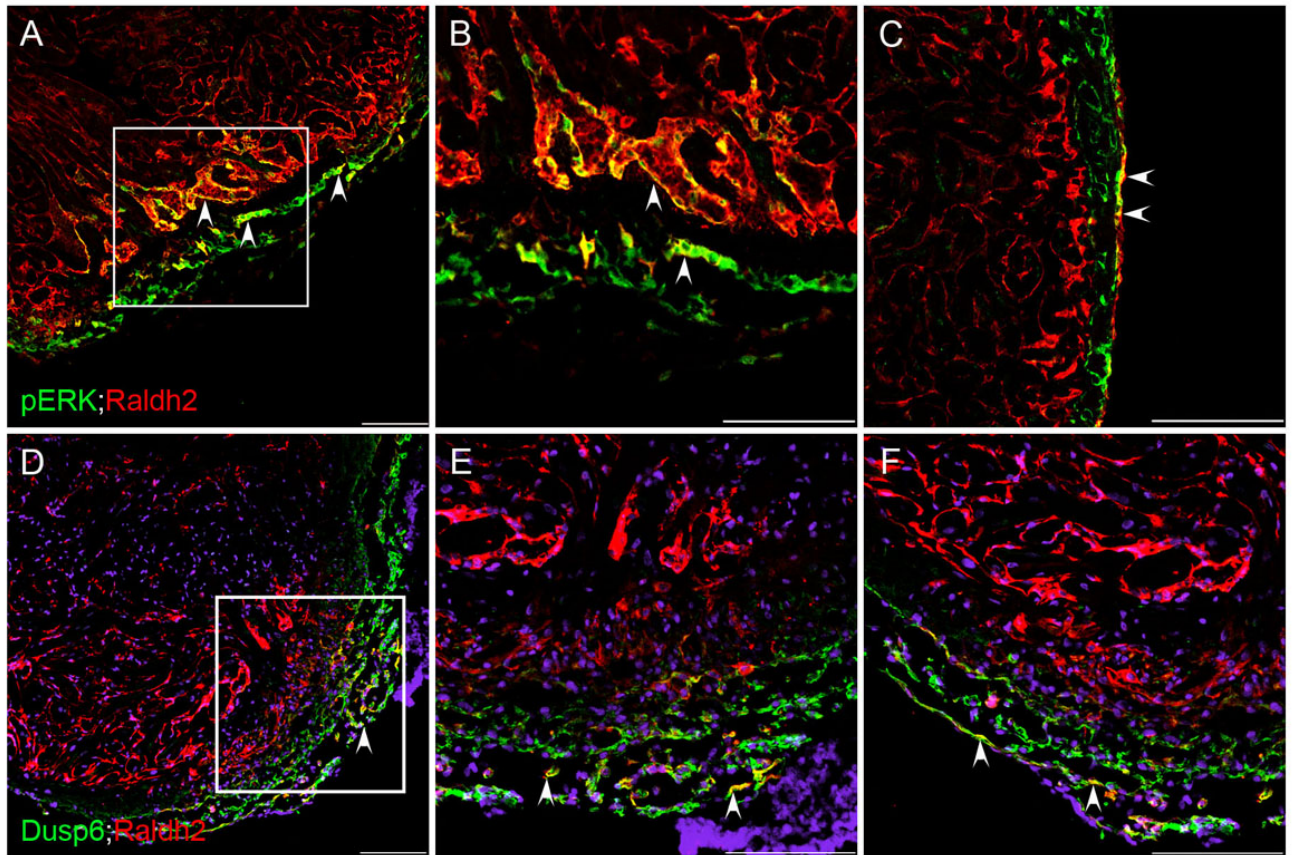

**Supplementary information, Figure S18. Both pErk and Dusp6 are induced in the epicardium during heart regeneration.** (A-C) Immunostaining shows colocalization of pErk (green) and the epicardial and endocardial marker Raldh2 protein (red) in the injured (A-B) and uninjured areas (C) at 14 dpa. (D-F) Immunostaining shows colocalization of Dusp6 (green) and the epicardial and endocardial marker Raldh2 protein (red) in the epicardium of the injured (D-E) and uninjured areas (F) at 14 dpa. Arrowheads point to double stained epicardial cells. DAPI was used for labeling nuclei. Scale bars: 100  $\mu$ m.
