# Supplementary material
Source: PubMed Central journal article supplement (PMC4152734)
Supplement: cr2014108x19.pdf [file cr2014108x19.pdf]

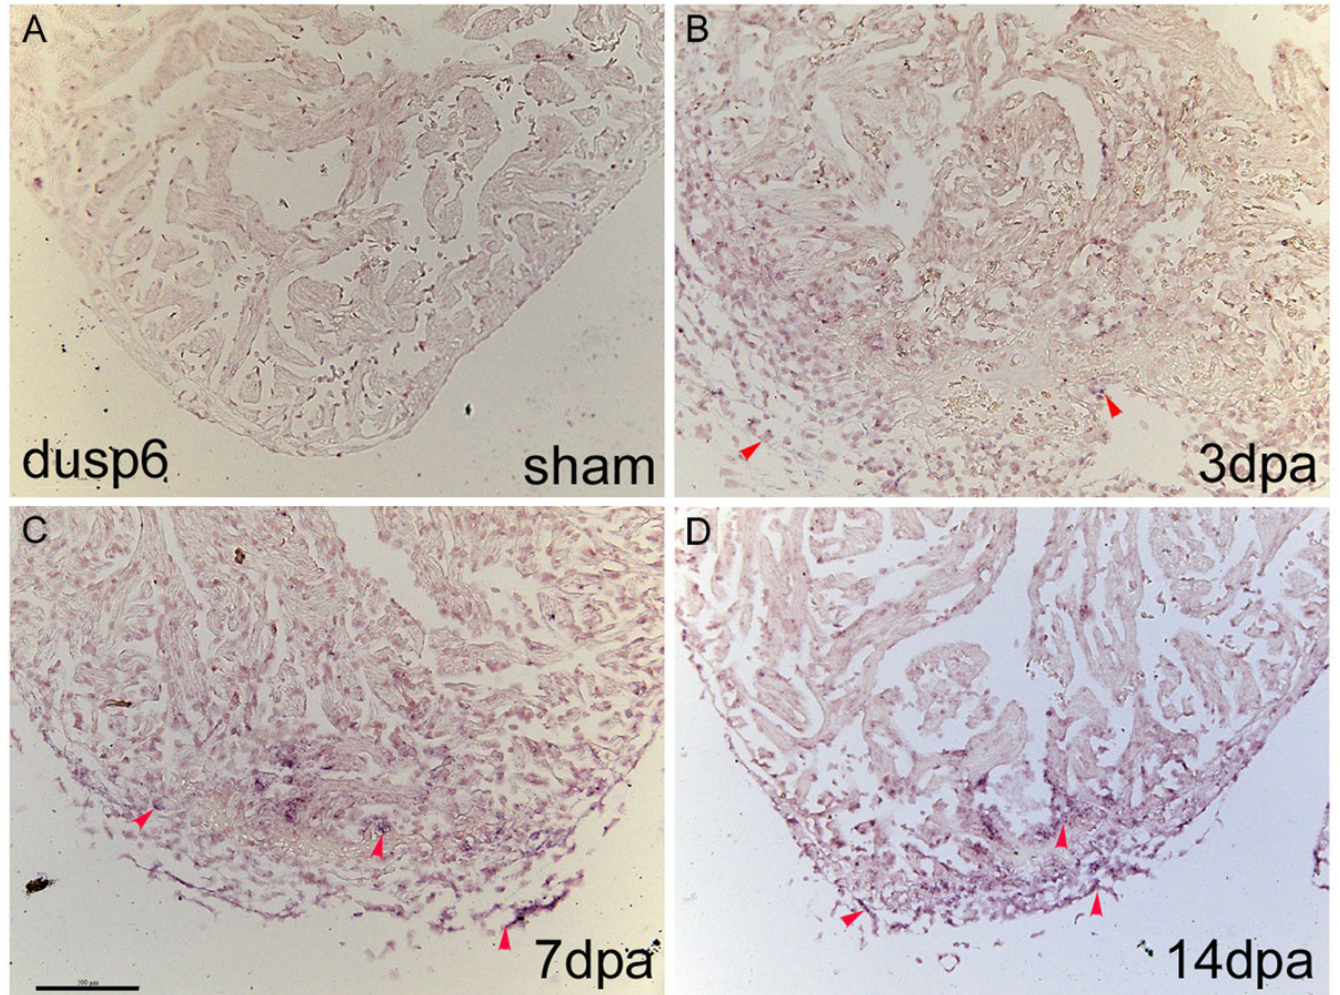

**Supplementary information, Figure S19. *Dusp6* expression after ventricular resection.**

Compared with sham control (A), *dusp6* was induced in injured areas of hearts at 3, 7 and 14 dpo (B-D; red arrowheads) as shown by RNA *in situ* hybridization. Scale bar: 100  $\mu$ m.
