# Supplementary material
Source: PubMed Central journal article supplement (PMC4152734)
Supplement: cr2014108x20.pdf [file cr2014108x20.pdf]

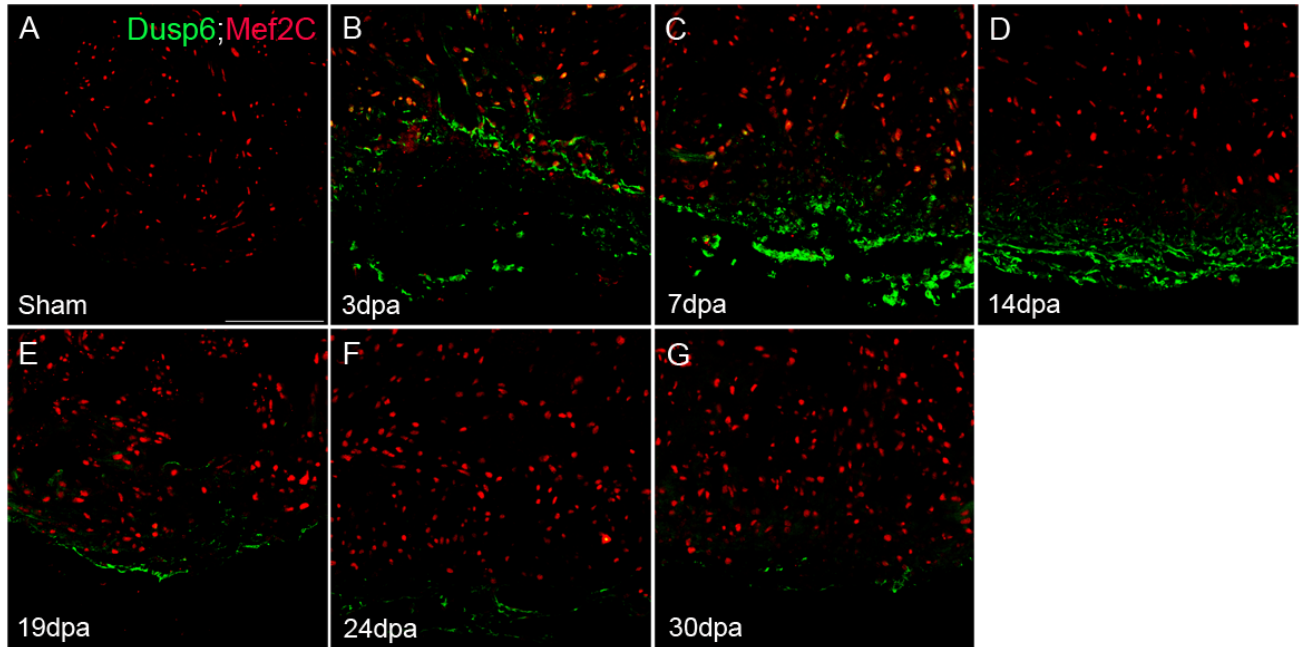

**Supplementary information, Figure S20. Dusp6 are induced primarily in non-myocardium during heart regeneration.** (A-G) Immunostaining showing no expression of Dusp6 at sham (A), and Dusp6 (green) in the injured area at 3 dpa (B), 7 dpa (C), 14 dpa (D), 19 dpa (E), 24 dpa (F) and 30 dpa (G) but with no or little overlapping with and the myocardial marker Mef2C (red). Scale bars: 100  $\mu$ m.
