# Supplementary material
Source: PubMed Central journal article supplement (PMC4152734)
Supplement: cr2014108x21.pdf [file cr2014108x21.pdf]

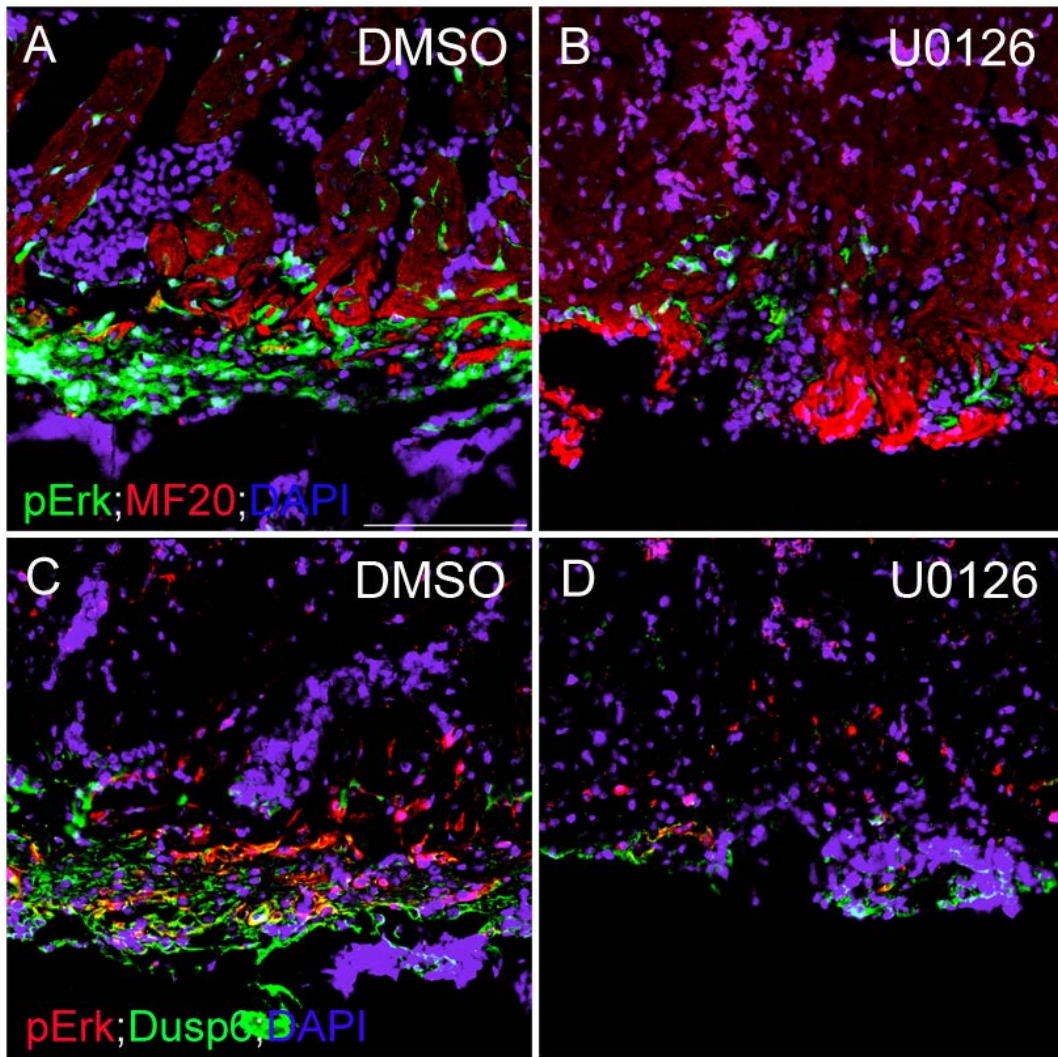

**Supplementary information, Figure S21. Inhibiting pErk by U0126 decreases Dusp6 expression during heart regeneration.** (A-B) Immunostaining showing pErk expression in DMSO-treated (A) and U0126-treated (B) hearts at 14 dpa. MF20 for labeling myocytes; DAPI for labeling nuclei. (C-D) Double staining of pErk and Dusp6 in DMSO-treated (C) and U0126-treated (D) hearts at 14 dpa. Note partial overlapping of the two protein expression and dependence of Dusp6 on pErk. N=3-5. Scale bars: 100  $\mu$ m.
