# Supplementary material
Source: PubMed Central journal article supplement (PMC4152734)
Supplement: cr2014108x23.pdf [file cr2014108x23.pdf]

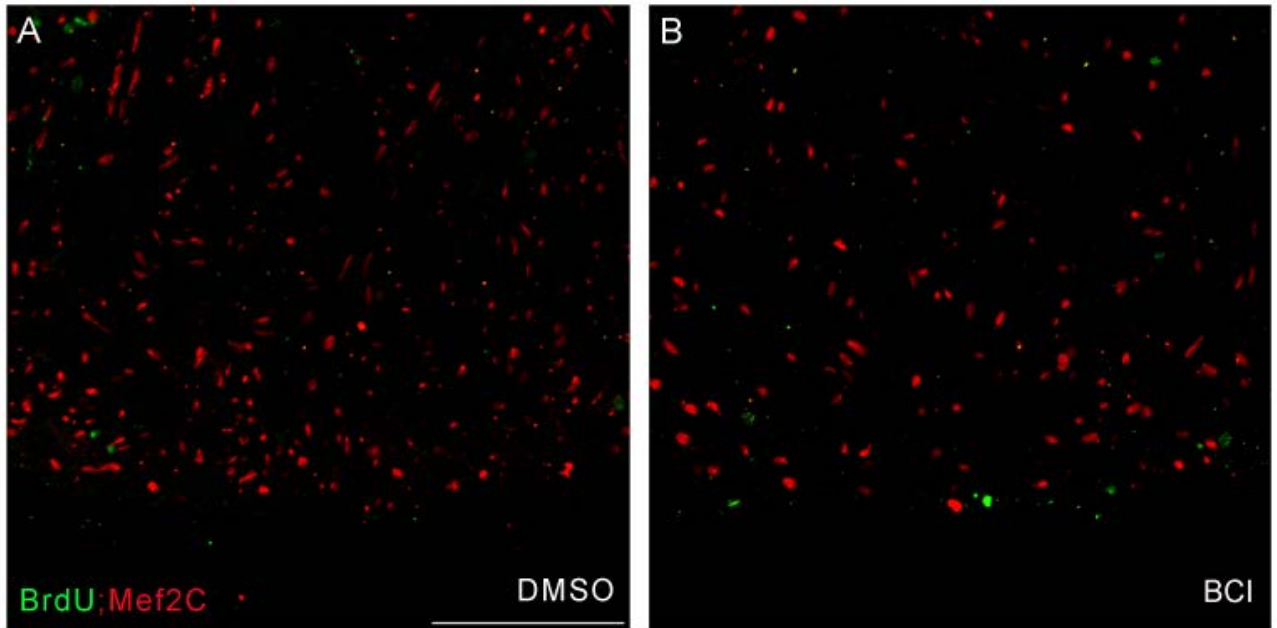

**Supplementary information, Figure S23.** BCI does not stimulate myocyte proliferation in adult hearts. DMSO or 20  $\mu$ M BCI was co-injected with BrdU into the thoracic cavity of sham-operated zebrafish hearts once daily for 7 days. (A-B) Immunostaining of control DMSO-injected (A) and BCI-injected (B) hearts with anti-BrdU and MF20. Note that BCI did not induce the entry of resting myocytes into proliferating myocytes. N=3.
