# Supplementary material
Source: PubMed Central journal article supplement (PMC4152734)
Supplement: cr2014108x25.pdf [file cr2014108x25.pdf]

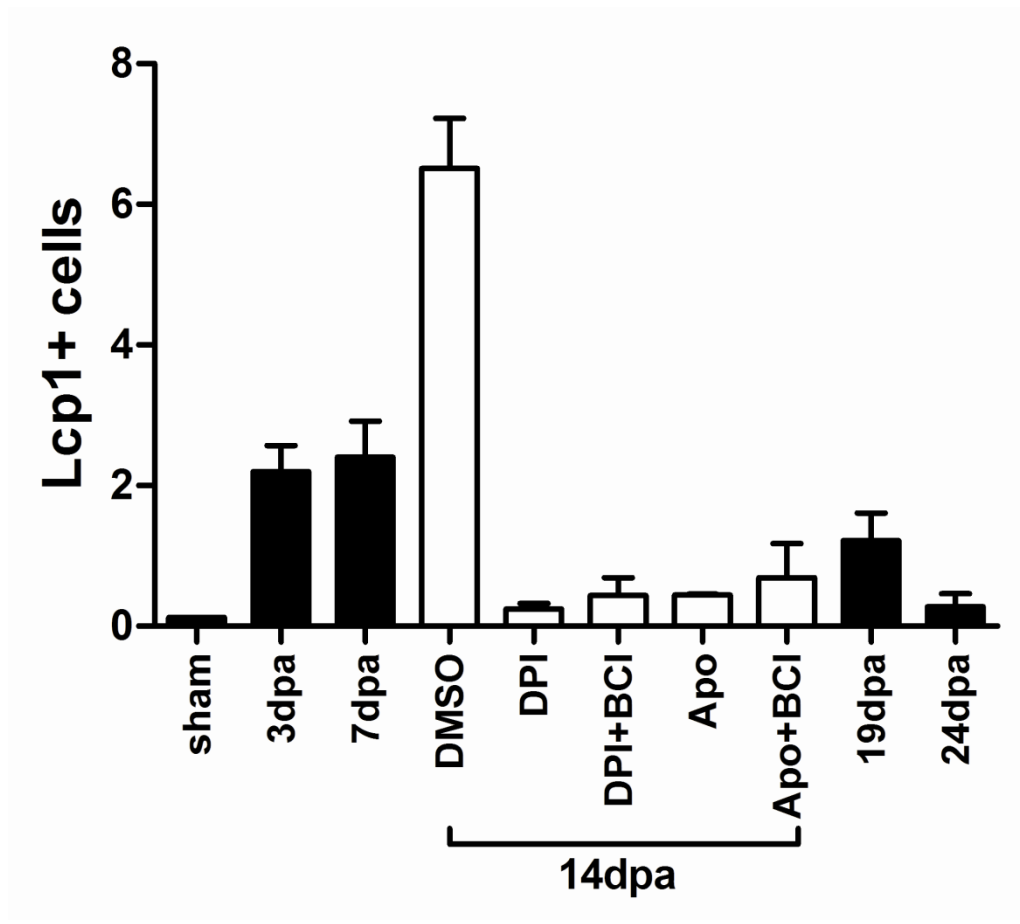

Supplementary information, Figure S25. Quantification of DPI or Apo effects on Lcp1<sup>+</sup> leukocytes during heart regeneration in Figure 6.
