# Supplementary material
Source: PubMed Central journal article supplement (PMC4152734)
Supplement: cr2014108x31.pdf [file cr2014108x31.pdf]

**Supplementary information, Table S5** Gene-specific primer sequences

Primer sequences for making RNA in situ probes (F for forward primer and R for reverse primer):

nox1: F 5'-TGCTGGTTTAGTTTTCCACGG-3'; R 5'-TTCGGGGATCAACATCA-3';

nox2: F 5'-GGTGCTTCATGGAATCGG-3'; R 5'-GTGTGAAAGGCACTGCTTGCT;

nox4: F 5'-TCAGTATCGAGGGCAGGA-3'; R

5'-ACATGCGCAATTCTATGACAT-3';

nox5: F 5'-GTTGTCCACTGTGCAAACCTT-3'; R

5'-CACTGAGCCTTGATGACTTT-3';

duox: 1F 5'-TACGTCTTCGCCTCGCACTAT-3'; 1R

5'-GTCTGGTCGCGTTTGTTTCAT-3'.

duox: 2F 5'-

ATCGAAATTAACCCTCACTAAAGGGAACGATGATGCCAGTAAATCT-3'

duox: 2R 5'-

ATCGATAATACGACTCACTATAGGGAGACACTGCGCTTCTGCTGGAAT-3'

**Primer sequences for performing RT-PCR:**

*$\beta$ -actin*: F 5'-CATTGGCAATGAGCGTTTC-3'; R

5'-TACTCCTGCTTGCTGATCCAC3';

nox1: F 5'-ATGGGCAACTGGATCATC-3'; R 5'-CTTGTGGAAAGTCAGATT-3';

nox2: F 5'-ATGGGAAACTTTGCTGCA-3'; R 5'-AAGGCAATCATGTAGGCC-3';

nox4: F 5'-ATGTGAGTGCACATCTCG-3'; R 5'-GAAGCCTCTTCTTGACAG-3';

*nox5*: F 5'-TGGCCTAATGGTGGTCTGTTC-3'; R

5'-CAGAGCCGAAACCCAGATG-3';

*duox*: F 5'-GTTGGCTTTGGTGTAAGTGTGTA-3'; R 5'-GCCCAGGCTGTGAGAG-3'
